# Supplementary material for: Association Between Change in Body Mass Index and Depression Severity During a Three-Month Dietary Intervention: A Quasi-Experimental Study
Source: Research Square preprint supplement (doi:10.21203/rs.3.rs-8014786/v1), 2025-11-04
Supplement: Supplementary file 1 [file 0e07736d194238d395da7370.docx]

**Table 6. Linear Regression Analysis: Predictors of Change in Hamilton Depression Rating Scale Score**

| **Predictor** | **B** | **Beta** | **t** | **p-value** |
| --- | --- | --- | --- | --- |
| Constant | 1.395 | — | 0.650 | 0.516 |
| **Change in BMI** | **0.493** | **0.240** | **4.121** | **< 0.001** |
| Age | -0.040 | -0.051 | -0.832 | 0.406 |
| Gender | 0.072 | 0.009 | 0.135 | 0.893 |
| Residence Status | 0.958 | 0.113 | 1.905 | 0.058 |
| Caloric Intake | 0.001 | 0.095 | 1.350 | 0.178 |

Dependent variable: Change in HAMD score. B: Unstandardized coefficient; Beta: Standardized coefficient; BMI: Body Mass Index; HAMD: Hamilton Depression Rating Scale. Bold values indicate statistical significance at p < 0.05.
