# Supplementary material for: Association Between Change in Body Mass Index and Depression Severity During a Three-Month Dietary Intervention: A Quasi-Experimental Study
Source: Research Square preprint supplement (doi:10.21203/rs.3.rs-8014786/v1), 2025-11-04
Supplement: Supplementary file 2 [file 2ddf75cb250202e4a9d8abec.docx]

**Table 4. Comparison of Hamilton Depression Rating Scale (HAMD-17) Scores at Baseline and After 3-Month Intervention**

| **Parameter** | **Baseline** | **After 3 Months** |
| --- | --- | --- |
| N | 277 | 277 |
| Mean HAMD Score | 14.05 | 10.51 |
| Standard Deviation | 4.55 | 4.00 |
| Mean Difference | 3.54 points | |
| 95% CI of Difference | 3.07 - 3.99 | |
| Paired Samples Correlation | r = 0.58 | |
| t-statistic (df) | t = 14.98 (276) | |
| p-value | < 0.001 | |

HAMD: Hamilton Depression Rating Scale; CI: Confidence Interval; df: degrees of freedom
