# Supplementary material for: Association Between Change in Body Mass Index and Depression Severity During a Three-Month Dietary Intervention: A Quasi-Experimental Study
Source: Research Square preprint supplement (doi:10.21203/rs.3.rs-8014786/v1), 2025-11-04
Supplement: Supplementary file 3 [file 8017012d9e2f5bcc58531b0d.docx]

**Table 2. Baseline Anthropometric Measurements (N=277)**

| **Variable** | **Mean ± SD (Range)** |
| --- | --- |
| Height (m) | 1.61 ± 0.11 (1.40-1.80) |
| Weight (kg) | 82.31 ± 10.66 (46-113) |
| BMI (kg/m²) | 32.01 ± 3.24 (22-46) |

BMI: Body Mass Index; SD: Standard Deviation
