# Supplementary material for: Association Between Change in Body Mass Index and Depression Severity During a Three-Month Dietary Intervention: A Quasi-Experimental Study
Source: Research Square preprint supplement (doi:10.21203/rs.3.rs-8014786/v1), 2025-11-04
Supplement: Supplementary file 4 [file 897483af76f3eaf2bd8a6c33.docx]

**Table 5. Distribution of Depression Severity Categories at Baseline and After 3-Month Intervention**

| **Depression Severity** | **Baseline N (%)** | **After 3 Months N (%)** |
| --- | --- | --- |
| Normal (0-7) | 21 (7.58%) | 64 (23.10%) |
| Mild (8-13) | 142 (51.26%) | 175 (63.18%) |
| Moderate (14-18) | 87 (31.41%) | 29 (10.47%) |
| Severe (19-22) | 21 (7.58%) | 3 (1.08%) |
| Very Severe (>23) | 6 (2.17%) | 6 (2.17%) |
| **Total** | **277 (100%)** | **277 (100%)** |
