# Supplementary material for: Association Between Change in Body Mass Index and Depression Severity During a Three-Month Dietary Intervention: A Quasi-Experimental Study
Source: Research Square preprint supplement (doi:10.21203/rs.3.rs-8014786/v1), 2025-11-04
Supplement: Supplementary file 5 [file 9bbeb0e1535381cc0c794f43.docx]

**Table 3. Comparison of Body Mass Index at Baseline and After 3-Month Intervention**

| **Parameter** | **Baseline** | **After 3 Months** |
| --- | --- | --- |
| N | 277 | 277 |
| Mean BMI (kg/m²) | 31.96 | 30.16 |
| Standard Deviation | 3.80 | 4.20 |
| Mean Difference | 1.80 kg/m² | |
| 95% CI of Difference | 1.56 - 2.02 | |
| Paired Samples Correlation | r = 0.89 | |
| t-statistic (df) | t = 15.60 (276) | |
| p-value | < 0.001 | |

BMI: Body Mass Index; CI: Confidence Interval; df: degrees of freedom
