# Supplementary material for: Association Between Change in Body Mass Index and Depression Severity During a Three-Month Dietary Intervention: A Quasi-Experimental Study
Source: Research Square preprint supplement (doi:10.21203/rs.3.rs-8014786/v1), 2025-11-04
Supplement: Supplementary file 6 [file ad280caece0a55002ee06dfa.docx]

**Table 1. Demographic and Baseline Characteristics of Study Participants (N=277)**

| **Characteristic** | **Category** | **N (%)** |
| --- | --- | --- |
| Age (years) | Mean ± SD (Range) | 25.55 ± 5.88 (18-38) |
| Gender | Male | 139 (50.18%) |
| Female | 138 (49.82%) |
| Occupation | Student | 192 (69.31%) |
| Doctor | 35 (12.50%) |
| Guard | 12 (4.33%) |
| Others | 38 (13.72%) |
| Residence | Rented | 191 (69.0%) |
| Own | 86 (31.0%) |
| Monthly Income | < Rs. 100,000 | 252 (90.97%) |
| > Rs. 100,000 | 25 (9.03%) |
